# Supplementary material for: Development of Next-Generation Probiotics by Investigating the Interrelationships between Gastrointestinal Microbiota and Diarrhea in Preruminant Holstein Calves
Source: MDPI journal article supplement (doi:10.3390/ani12060695), 2022-03-10
Supplement: s1 [file s1]

Table S1. The information of calf health status

| <b>Sample</b> | <b>Age(day)</b> | <b>Starter(Y/N)</b> | <b>Health status<sup>1</sup></b> | <b>Fecal score</b> |
|---------------|-----------------|---------------------|----------------------------------|--------------------|
| H01           | 32              | Y                   | H                                | 1                  |
| H02           | 40              | Y                   | H                                | 0                  |
| H03           | 30              | Y                   | H                                | 1                  |
| H04           | 51              | Y                   | H                                | 0                  |
| H05           | 39              | Y                   | H                                | 1                  |
| H06           | 31              | Y                   | H                                | 0                  |
| H07           | 43              | Y                   | H                                | 1                  |
| H08           | 43              | Y                   | H                                | 0                  |
| H09           | 35              | Y                   | H                                | 0                  |
| H10           | 41              | Y                   | H                                | 0                  |
| D01           | 30              | Y                   | D                                | 2                  |
| D02           | 30              | Y                   | D                                | 3                  |
| D03           | 44              | Y                   | D                                | 2                  |
| D04           | 49              | Y                   | D                                | 2                  |
| D05           | 41              | Y                   | D                                | 2                  |
| D06           | 48              | Y                   | D                                | 2                  |
| D07           | 38              | Y                   | D                                | 2                  |
| D08           | 33              | Y                   | D                                | 2                  |
| D09           | 35              | Y                   | D                                | 3                  |
| D10           | 33              | Y                   | D                                | 2                  |

<sup>1</sup> H: Health; D: Diarrhea

Table S2. The relative abundances (%) of dominant taxa in 20 fecal samples at genus and species levels

| Taxa                               | Whole(n=20) |      | Health(n=10) |      | Diarrhea(n=10) |      | P-value | Significance |
|------------------------------------|-------------|------|--------------|------|----------------|------|---------|--------------|
|                                    | Mean        | SD   | Mean         | SD   | Mean           | SD   |         |              |
| <b>Genus</b>                       |             |      |              |      |                |      |         |              |
| <i>Faecalibacterium</i>            | 15.31       | 6.98 | 16.72        | 5.54 | 13.90          | 7.80 | 0.248   | -            |
| <i>Prevotella_9</i>                | 9.45        | 7.27 | 12.70        | 7.67 | 6.20           | 5.13 | 0.075   | #            |
| <i>Bacteroides</i>                 | 9.09        | 5.80 | 8.60         | 6.36 | 9.58           | 5.20 | 0.631   | -            |
| <i>Prevotella_2</i>                | 6.32        | 5.12 | 6.83         | 6.12 | 5.82           | 3.96 | 0.684   | -            |
| <i>Ruminococcaceae_UCG_014</i>     | 6.06        | 4.15 | 8.81         | 3.32 | 3.31           | 2.77 | 0.002   | **           |
| <i>Megamonas</i>                   | 5.74        | 5.32 | 6.13         | 4.31 | 5.35           | 6.06 | 0.342   | -            |
| <i>Alloprevotella</i>              | 5.07        | 5.28 | 2.71         | 3.74 | 7.43           | 5.41 | 0.035   | *            |
| <i>Blautia</i>                     | 3.49        | 1.97 | 3.49         | 2.46 | 3.49           | 1.39 | 0.529   | -            |
| <i>Parabacteroides</i>             | 2.82        | 2.36 | 2.69         | 3.05 | 2.95           | 1.46 | 0.280   | -            |
| <i>Phascolarctobacterium</i>       | 2.81        | 2.00 | 2.83         | 2.44 | 2.79           | 1.51 | 0.631   | -            |
| <i>Bifidobacterium</i>             | 2.45        | 2.11 | 3.56         | 2.22 | 1.33           | 1.23 | 0.015   | *            |
| <i>Rikenellaceae_RC9_gut_group</i> | 1.58        | 2.64 | 1.62         | 3.28 | 1.53           | 1.89 | 0.723   | -            |
| <i>Holdemanella</i>                | 1.47        | 2.24 | 1.96         | 2.84 | 0.99           | 1.35 | 0.868   | -            |
| <i>Sutterella</i>                  | 1.47        | 1.62 | 1.88         | 2.00 | 1.05           | 1.01 | 0.315   | -            |
| <i>Megasphaera</i>                 | 1.43        | 2.32 | 1.88         | 2.85 | 0.98           | 1.59 | 0.481   | -            |
| <i>Collinsella</i>                 | 1.31        | 1.38 | 1.18         | 0.51 | 1.45           | 1.83 | 0.481   | -            |
| <i>Anaerovibrio</i>                | 0.93        | 1.63 | 0.75         | 0.97 | 1.11           | 2.03 | 0.896   | -            |
| <i>Subdoligranulum</i>             | 0.86        | 1.05 | 0.45         | 0.56 | 1.27           | 1.22 | 0.043   | *            |

|                                      |      |      |      |      |      |      |        |     |
|--------------------------------------|------|------|------|------|------|------|--------|-----|
| <i>Succinivibrio</i>                 | 0.83 | 2.42 | 0.29 | 0.29 | 1.37 | 3.23 | 0.752  | -   |
| <i>Tyzzerella_4</i>                  | 0.69 | 0.96 | 0.59 | 0.75 | 0.79 | 1.17 | 0.796  | -   |
| <i>[Ruminococcus]_gnavus_group</i>   | 0.64 | 0.65 | 0.77 | 0.42 | 0.51 | 0.82 | 0.092  | #   |
| <i>Ruminococcaceae_UCG_005</i>       | 0.53 | 1.16 | 0.07 | 0.19 | 1.00 | 1.53 | 0.003  | **  |
| <i>Ruminococcus_2</i>                | 0.53 | 0.63 | 0.28 | 0.38 | 0.77 | 0.75 | 0.023  | *   |
| <i>Fournierella</i>                  | 0.51 | 0.73 | 0.39 | 0.40 | 0.62 | 0.97 | 0.853  | -   |
| <i>Lachnoclostridium</i>             | 0.47 | 0.50 | 0.26 | 0.20 | 0.67 | 0.62 | 0.046  | *   |
| <i>Prevotella_7</i>                  | 0.46 | 0.74 | 0.37 | 0.63 | 0.56 | 0.85 | 0.105  | -   |
| <i>Odoribacter</i>                   | 0.46 | 0.75 | 0.14 | 0.35 | 0.77 | 0.93 | 0.036  | *   |
| <i>Corynebacterium_1</i>             | 0.44 | 1.92 | 0.00 | 0.00 | 0.88 | 2.72 | 0.225  | -   |
| <i>Sharpea</i>                       | 0.42 | 0.60 | 0.55 | 0.78 | 0.29 | 0.34 | 0.895  | -   |
| <i>Acidaminococcus</i>               | 0.42 | 0.65 | 0.39 | 0.39 | 0.44 | 0.87 | 0.217  | -   |
| <i>Ruminiclostridium_9</i>           | 0.37 | 0.22 | 0.22 | 0.13 | 0.53 | 0.19 | <0.001 | *** |
| <i>Pseudoflavonifractor</i>          | 0.37 | 0.34 | 0.51 | 0.40 | 0.23 | 0.22 | 0.030  | *   |
| <i>Lachnospiraceae_NK4A136_group</i> | 0.36 | 1.52 | 0.01 | 0.03 | 0.71 | 2.14 | 0.004  | **  |
| <i>Escherichia_Shigella</i>          | 0.34 | 0.53 | 0.22 | 0.45 | 0.47 | 0.59 | 0.063  | #   |
| <i>Alistipes</i>                     | 0.33 | 0.42 | 0.23 | 0.44 | 0.44 | 0.40 | 0.211  | -   |
| <i>Tyzzerella</i>                    | 0.31 | 0.34 | 0.24 | 0.22 | 0.39 | 0.43 | 0.425  | -   |
| <i>Olsenella</i>                     | 0.31 | 0.35 | 0.20 | 0.22 | 0.42 | 0.43 | 0.218  | -   |
| <i>Fusobacterium</i>                 | 0.31 | 0.82 | 0.03 | 0.04 | 0.60 | 1.12 | 0.332  | -   |
| <i>Erysipelatoclostridium</i>        | 0.31 | 0.33 | 0.22 | 0.25 | 0.39 | 0.38 | 0.481  | -   |
| <i>Succiniclasticum</i>              | 0.30 | 0.72 | 0.24 | 0.37 | 0.35 | 0.97 | 0.670  | -   |

|                                            |      |      |      |      |      |      |       |    |
|--------------------------------------------|------|------|------|------|------|------|-------|----|
| <i>Helicobacter</i>                        | 0.29 | 1.06 | 0.08 | 0.16 | 0.50 | 1.50 | 0.166 | -  |
| <i>Erysipelotrichaceae_UCG_003</i>         | 0.28 | 0.56 | 0.42 | 0.73 | 0.15 | 0.28 | 0.740 | -  |
| <i>Dialister</i>                           | 0.28 | 0.73 | 0.13 | 0.39 | 0.43 | 0.97 | 0.844 | -  |
| <i>Oscillospira</i>                        | 0.23 | 0.23 | 0.22 | 0.25 | 0.25 | 0.21 | 0.424 | -  |
| <i>Prevotellaceae_NK3B31_group</i>         | 0.22 | 0.57 | 0.01 | 0.02 | 0.44 | 0.76 | 0.054 | #  |
| <i>[Ruminococcus]_torques_group</i>        | 0.22 | 0.21 | 0.31 | 0.25 | 0.13 | 0.12 | 0.063 | #  |
| <i>[Ruminococcus]_gauvreauii_group</i>     | 0.21 | 0.30 | 0.10 | 0.15 | 0.33 | 0.37 | 0.050 | *  |
| <i>Desulfovibrio</i>                       | 0.21 | 0.55 | 0.10 | 0.10 | 0.33 | 0.77 | 0.925 | -  |
| <i>Pelistega</i>                           | 0.20 | 0.78 | 0.04 | 0.05 | 0.37 | 1.11 | 0.404 | -  |
| <i>Negativibacillus</i>                    | 0.20 | 0.14 | 0.16 | 0.13 | 0.24 | 0.15 | 0.403 | -  |
| <i>Lactobacillus</i>                       | 0.20 | 0.49 | 0.06 | 0.07 | 0.34 | 0.68 | 0.986 | -  |
| <i>Akkermansia</i>                         | 0.20 | 0.67 | 0.07 | 0.14 | 0.33 | 0.94 | 0.473 | -  |
| <i>Faecalicoccus</i>                       | 0.19 | 0.23 | 0.18 | 0.17 | 0.20 | 0.29 | 0.353 | -  |
| <i>Barnesiella</i>                         | 0.17 | 0.32 | 0.12 | 0.25 | 0.22 | 0.38 | 0.278 | -  |
| <i>Ruminiclostridium_5</i>                 | 0.16 | 0.22 | 0.15 | 0.23 | 0.17 | 0.22 | 0.739 | -  |
| <i>Dorea</i>                               | 0.16 | 0.12 | 0.19 | 0.12 | 0.13 | 0.12 | 0.315 | -  |
| <i>Prevotella_1</i>                        | 0.15 | 0.35 | 0.16 | 0.43 | 0.15 | 0.27 | 0.410 | -  |
| <i>Butyricimonas</i>                       | 0.14 | 0.21 | 0.08 | 0.14 | 0.20 | 0.25 | 0.590 | -  |
| <i>Ruminococcus_1</i>                      | 0.12 | 0.53 | 0.00 | 0.00 | 0.24 | 0.74 | 0.211 | -  |
| <b>Species</b>                             |      |      |      |      |      |      |       |    |
| <i>Bifidobacterium_longum_subsp_longum</i> | 1.89 | 1.96 | 2.91 | 2.00 | 0.86 | 1.34 | 0.009 | ** |
| <i>Megasphaera_elsdenii</i>                | 1.28 | 2.10 | 1.67 | 2.57 | 0.89 | 1.54 | 0.618 | -  |
| <i>Bacteroides_plebeius_DSM_17135</i>      | 1.04 | 1.60 | 1.77 | 2.01 | 0.31 | 0.41 | 0.279 | -  |

|                                           |      |      |      |      |      |      |       |   |
|-------------------------------------------|------|------|------|------|------|------|-------|---|
| <i>Clostridium_sp_AUH_JLC235</i>          | 0.84 | 0.65 | 0.83 | 0.53 | 0.86 | 0.78 | 0.912 | - |
| <i>Bacteroides_fragilis</i>               | 0.48 | 1.25 | 0.21 | 0.51 | 0.75 | 1.70 | 0.645 | - |
| <i>Bacteroides_thetaiotaomicron</i>       | 0.48 | 0.69 | 0.45 | 0.90 | 0.51 | 0.43 | 0.063 | - |
| <i>bacterium_ic1277</i>                   | 0.44 | 0.62 | 0.17 | 0.31 | 0.71 | 0.74 | 0.018 | * |
| <i>Corynebacterium_sp</i>                 | 0.41 | 1.80 | 0.00 | 0.00 | 0.82 | 2.54 | 0.141 | - |
| <i>Bacteroidaceae_bacterium_DJF_B220</i>  | 0.23 | 1.02 | 0.00 | 0.00 | 0.46 | 1.45 | 0.999 | - |
| <i>Parabacteroides_distasonis</i>         | 0.21 | 0.20 | 0.21 | 0.22 | 0.20 | 0.18 | 0.971 | - |
| <i>unidentified_rumen_bacterium_JW32</i>  | 0.14 | 0.51 | 0.23 | 0.71 | 0.05 | 0.12 | 0.582 | - |
| <i>Bifidobacterium_animalis</i>           | 0.07 | 0.27 | 0.02 | 0.05 | 0.13 | 0.37 | 0.590 | - |
| <i>Prevotella_sp_DJF_CP65</i>             | 0.06 | 0.14 | 0.01 | 0.02 | 0.11 | 0.18 | 0.696 | - |
| <i>Lactobacillus_mucosae</i>              | 0.04 | 0.15 | 0.01 | 0.01 | 0.07 | 0.21 | 0.163 | - |
| <i>butyrate_producing_bacterium_L2_10</i> | 0.04 | 0.08 | 0.01 | 0.02 | 0.07 | 0.10 | 0.106 | - |
| <i>Lactobacillus_murinus</i>              | 0.04 | 0.07 | 0.02 | 0.02 | 0.06 | 0.10 | 0.558 | - |
| <i>Clostridium_sp_K4410MGS_306</i>        | 0.04 | 0.07 | 0.01 | 0.02 | 0.07 | 0.09 | 0.085 | - |
| <i>Lactobacillus_reuteri</i>              | 0.03 | 0.07 | 0.01 | 0.01 | 0.05 | 0.09 | 0.598 | - |
| <i>Gallibacterium_genomosp_3</i>          | 0.03 | 0.08 | 0.01 | 0.02 | 0.04 | 0.11 | 0.894 | - |
| <i>Corynebacterium_amycolatum</i>         | 0.03 | 0.11 | 0.00 | 0.00 | 0.05 | 0.15 | 0.195 | - |

---

Data were expressed as mean  $\pm$  SD. Mann-Whitney test was applied to evaluate the significant difference between the healthy and diarrheic groups.

Significant difference: \*  $P < 0.05$ ; \*\*  $P < 0.01$ ; \*\*\*  $P < 0.001$ .
